# Supplementary material
Source: ML conference proceedings conference paper supplement (https://proceedings.neurips.cc/paper_files/paper/2021/hash/16437d40c29a1a7b1e78143c9c38f289-Abstract.html)
Supplement: Supplementary file 1 [file 16437d40c29a1a7b1e78143c9c38f289-Supplemental.zip]

Archive with 2 entries (2 files):
- Demo_video.mp4
- NIPS2021_Final_Submission_Supplementary.pdf
